# Supplementary material for: Identification of Aggregation Processes in Hexamethylenetetramine Aqueous Solutions: A Comprehensive Raman and Acoustic Spectroscopic Study Combined with Density Functional Theory Calculations
Source: MDPI journal article supplement (doi:10.3390/molecules28237838), 2023-11-29
Supplement: s1 [file s1]

## Supplementary Material

Theoretically predicted molecular structures of HMTA molecule and all HMTA protonated and aggregated species. All quantum mechanical calculations were performed by means of B3LYP/6-311++g(d,p) method. Interatomic distances are also shown. See main text for more details concerning the theoretical calculations.

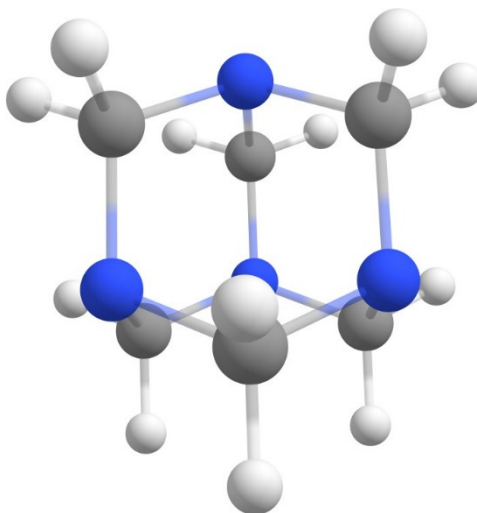

**Figure S1.** The optimized molecular structure of HMTA molecule.

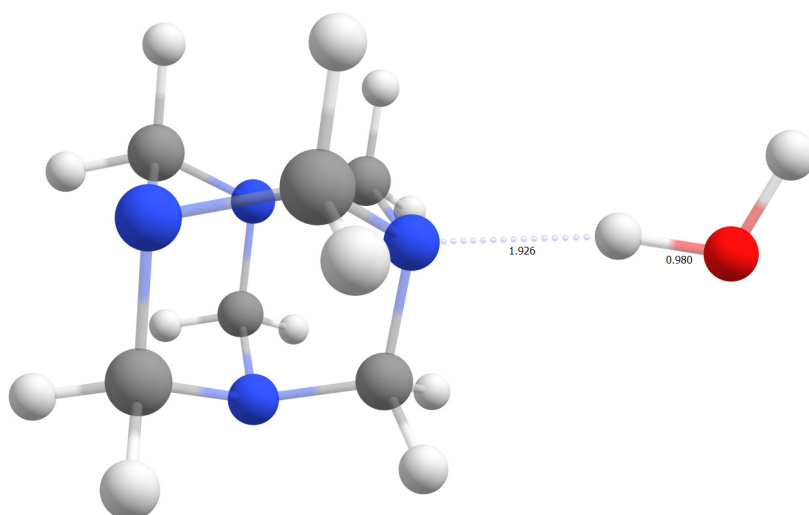

**Figure S2.** The optimized molecular structure of the HMTA·H<sub>2</sub>O aggregate with one water molecule.

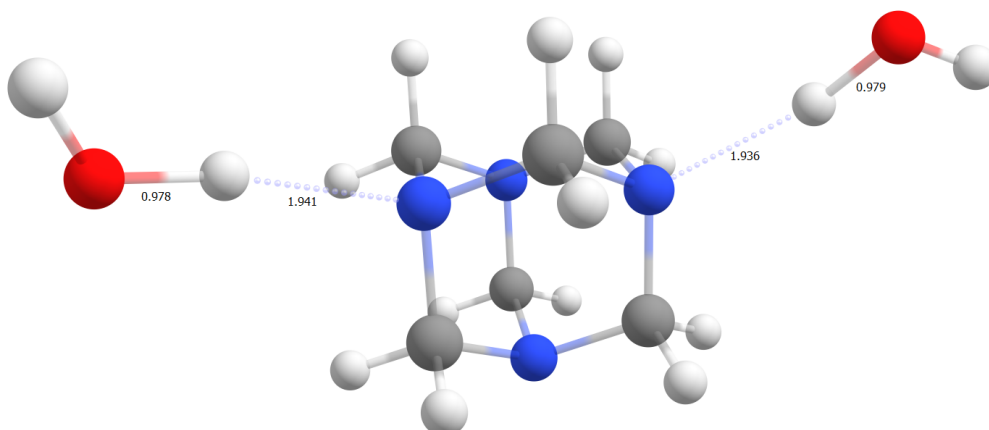

**Figure S3.** The optimized molecular structure of the HMTA·2H<sub>2</sub>O aggregate with two water molecules.

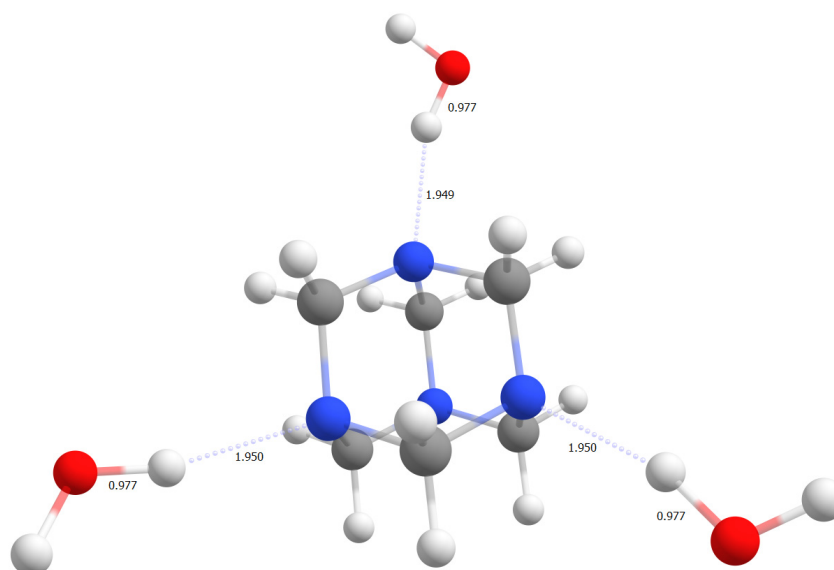

**Figure S4.** The optimized molecular structure of the HMTA·3H<sub>2</sub>O aggregate with three water molecules.

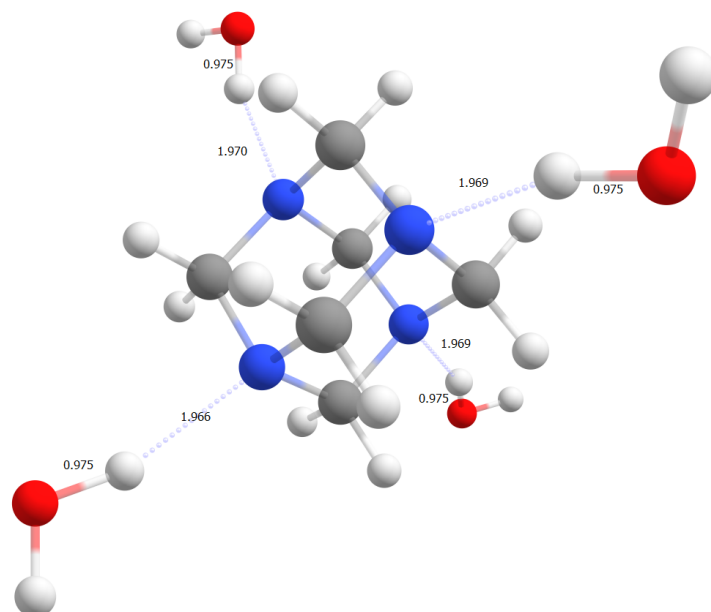

**Figure S5.** The optimized molecular structure of the HMTA·4H<sub>2</sub>O aggregate with four water molecules.

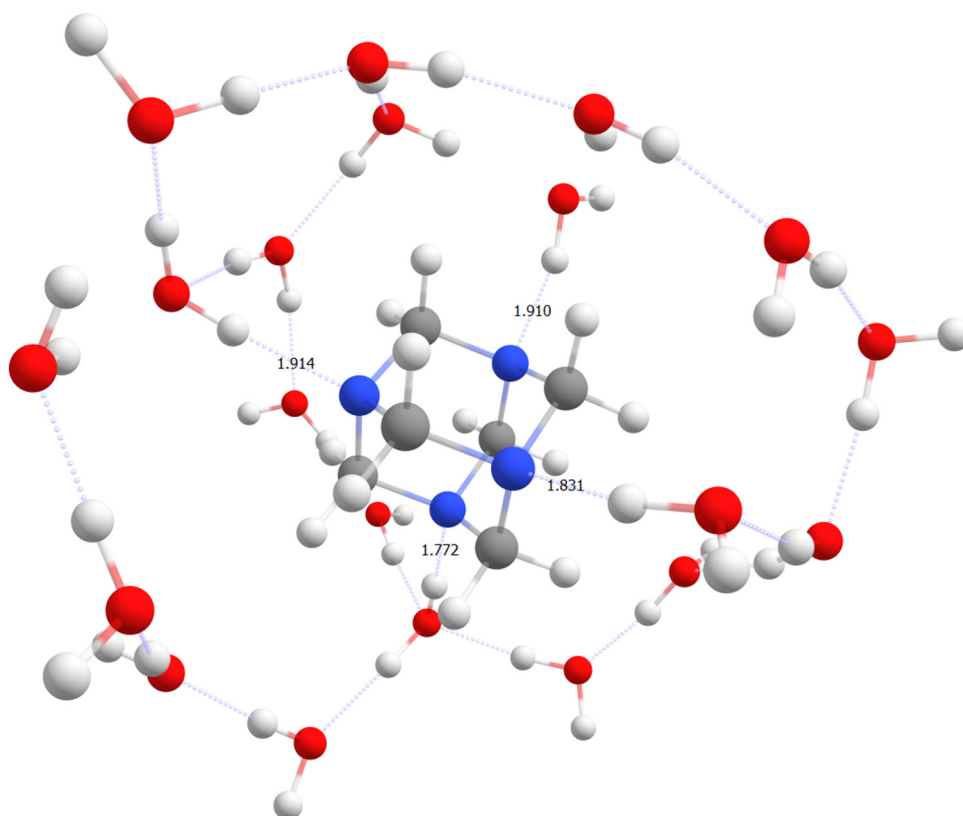

**Figure S6.** The optimized molecular structure of the HMTA·20H<sub>2</sub>O aggregate with twenty water molecules.

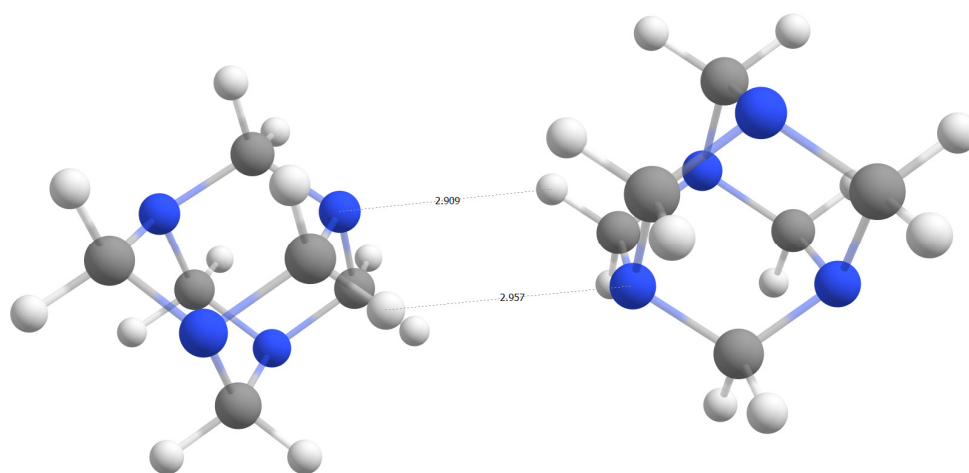

**Figure S7.** The optimized molecular structure of the (HMTA)<sub>2</sub> dimer.

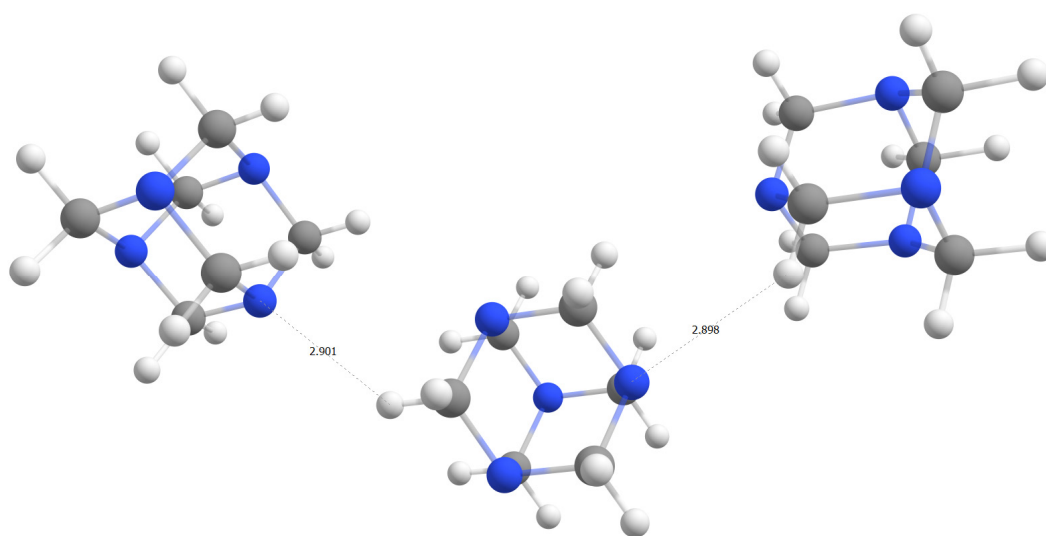

**Figure S8.** The optimized molecular structure of the (HMTA)<sub>3</sub> trimer.

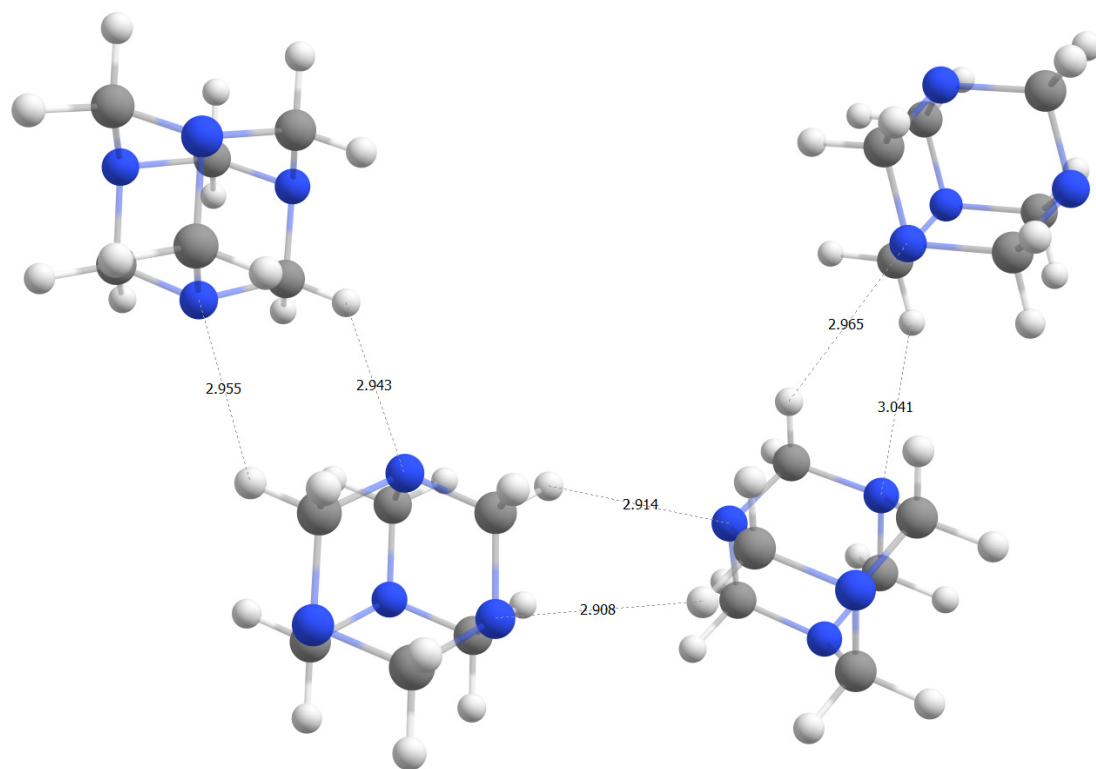

**Figure S9.** The optimized molecular structure of the (HMTA)<sub>4</sub> tetramer.
